# Supplementary material for: Characterization of m6A in mouse ovary and testis
Source: PubMed Central journal article supplement (PMC7423183; doi:10.1002/ctm2.141), 2020-08-12
Supplement: CTM2-10-e141-s001.pdf [file CTM2-10-e141-s001.pdf]

Figure S1

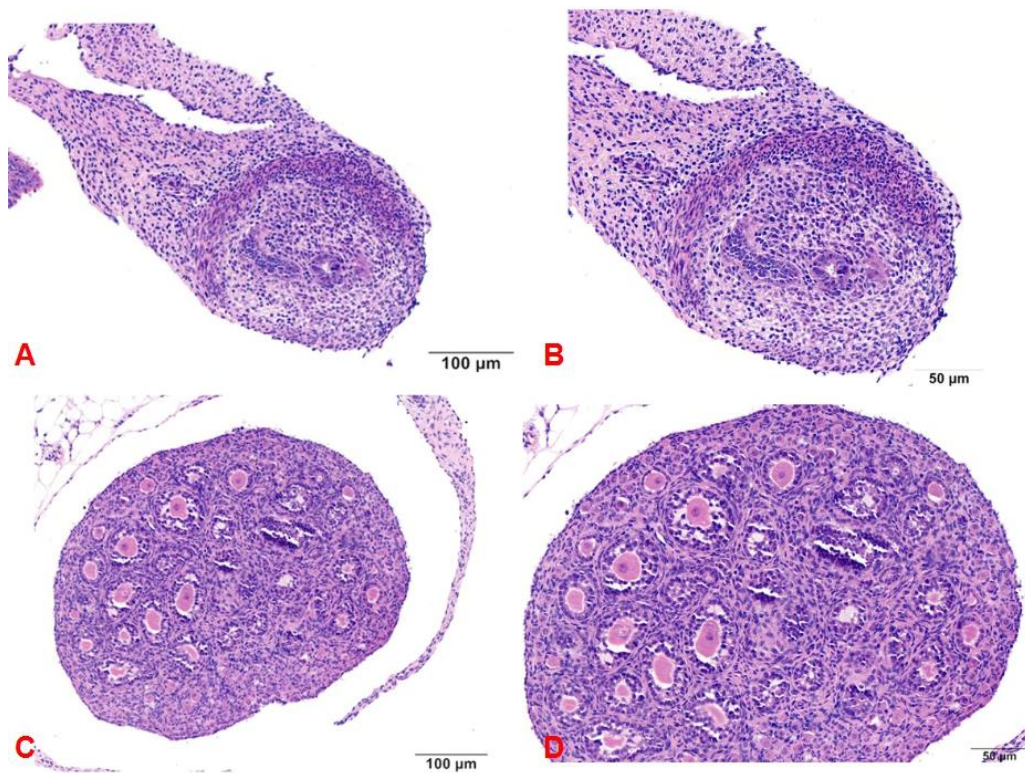

**Figure S1: HE staining of female genital ridges at 12.5dpc and ovaries at 7 dpp.** (A) 12.5dpc with the magnification of 100x, (B) 12.5dpc with the magnification of 200x, (C) 7dpp with the magnification of 100x, (D) 7 dpp with the magnification of 200x.

Figure S2

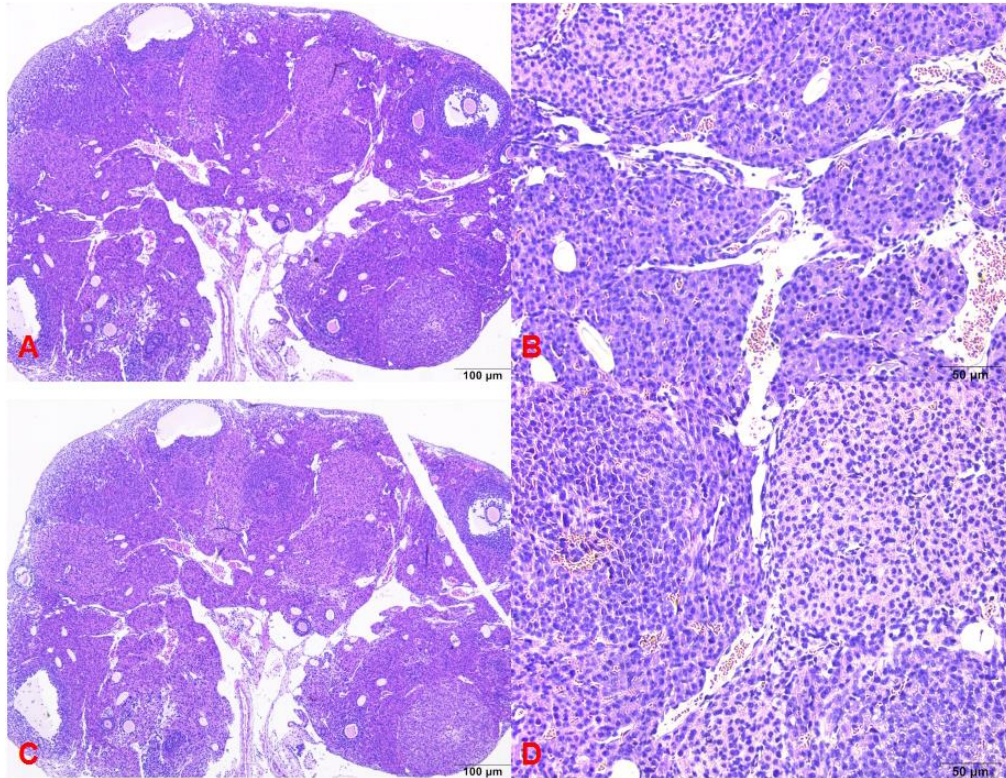

**Figure S2: HE staining of ovaries at luteal phase.** (A and C) with the magnification of 100x, (B and D) with the magnification of 200x.

Figure S3

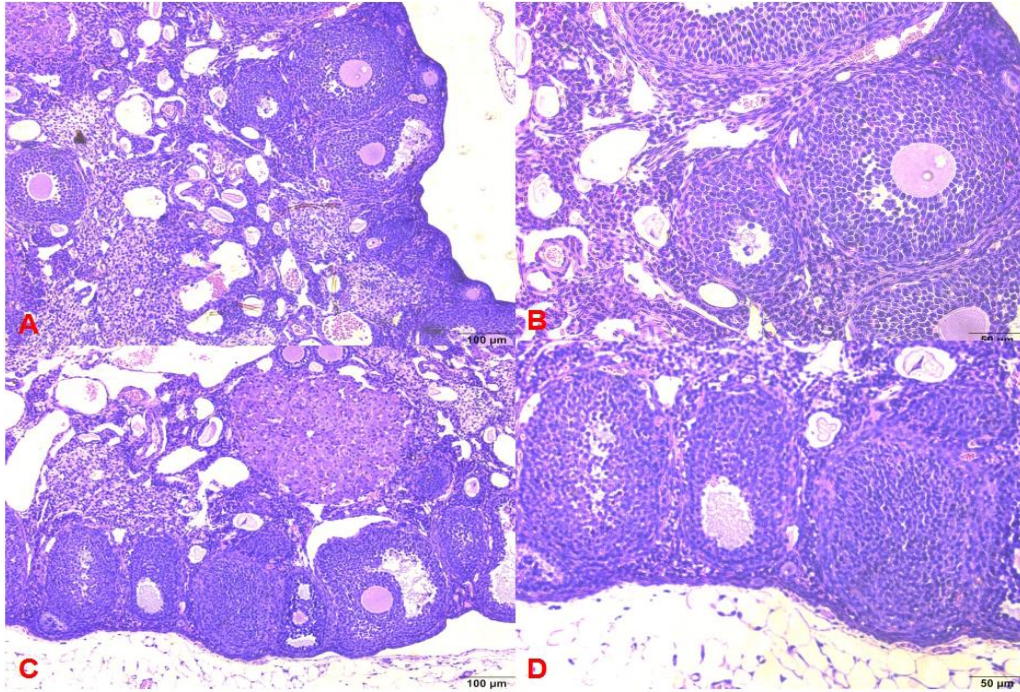

**Figure S3: HE staining ovaries at follicular phase. (A and C) with the magnification of 100x, (B and D) with the magnification of 200x.**

Figure S4

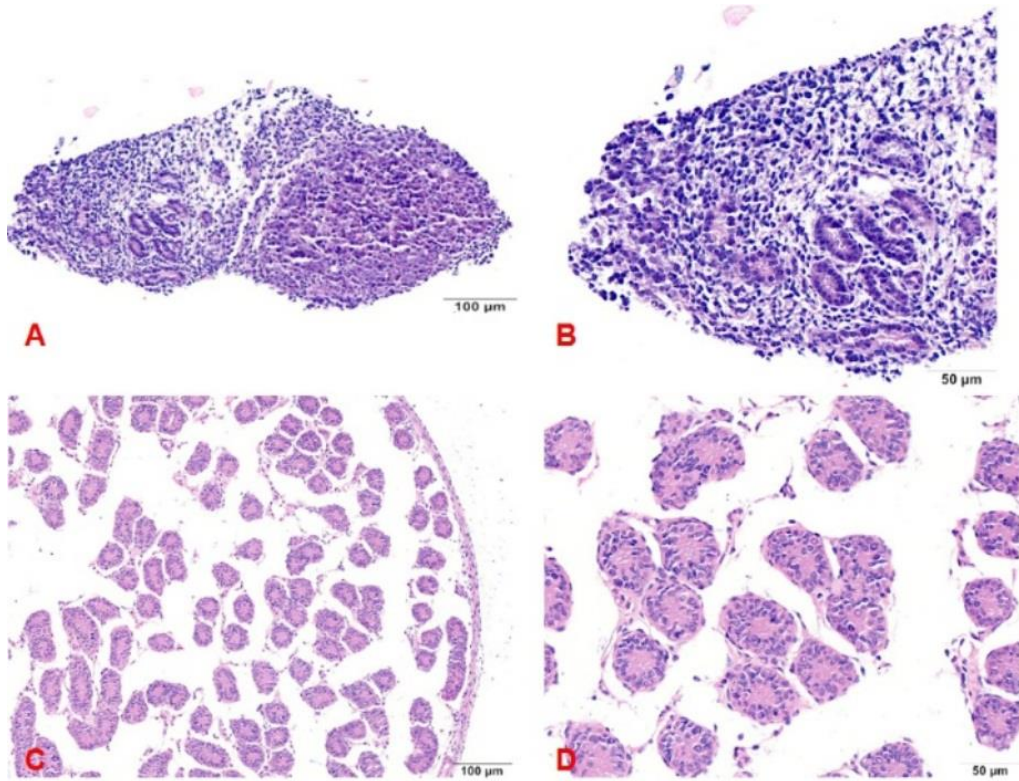

**Figure S4: HE staining of male genital ridges at 12.5dpc and testes at 7 dpp.** (A) 12.5dpc with the magnification of 100x, (B) 12.5dpc with the magnification of 200x, (C) 7dpp with the magnification of 100x, (D) 7 dpp with the magnification of 200x.

Figure S5

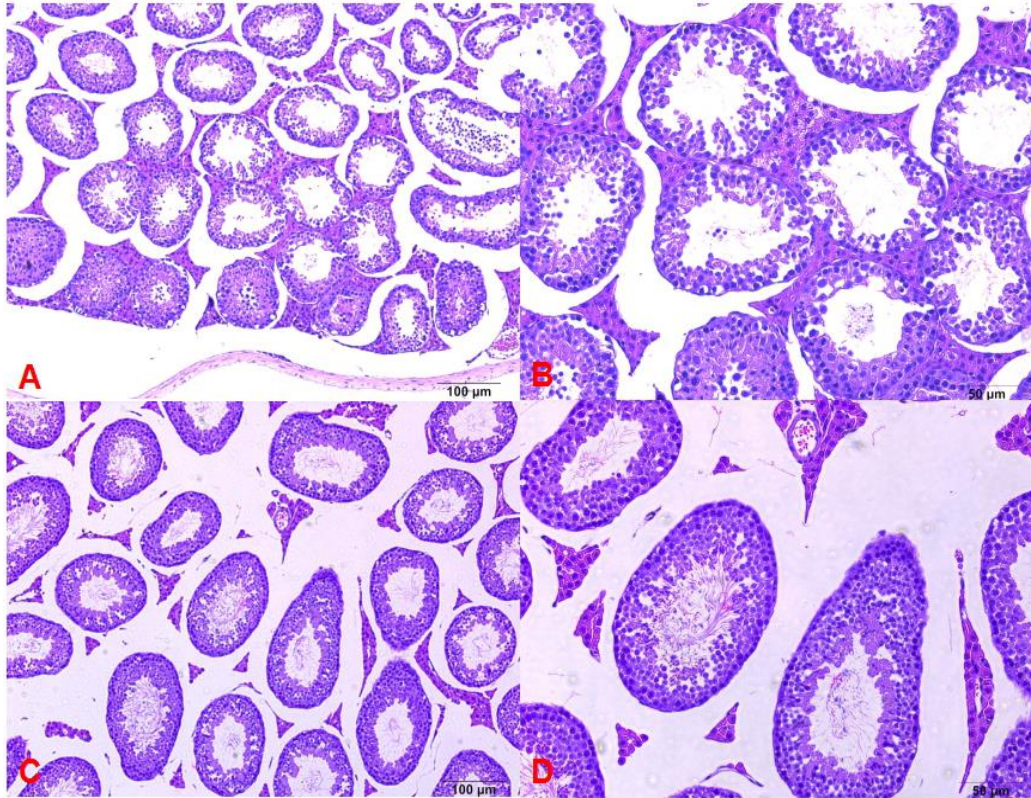

**Figure S5: HE staining of adult mouse testes (49 dpp).** (A and C) with the magnification of 100x, (B and D) with the magnification of 200x.

Figure S6

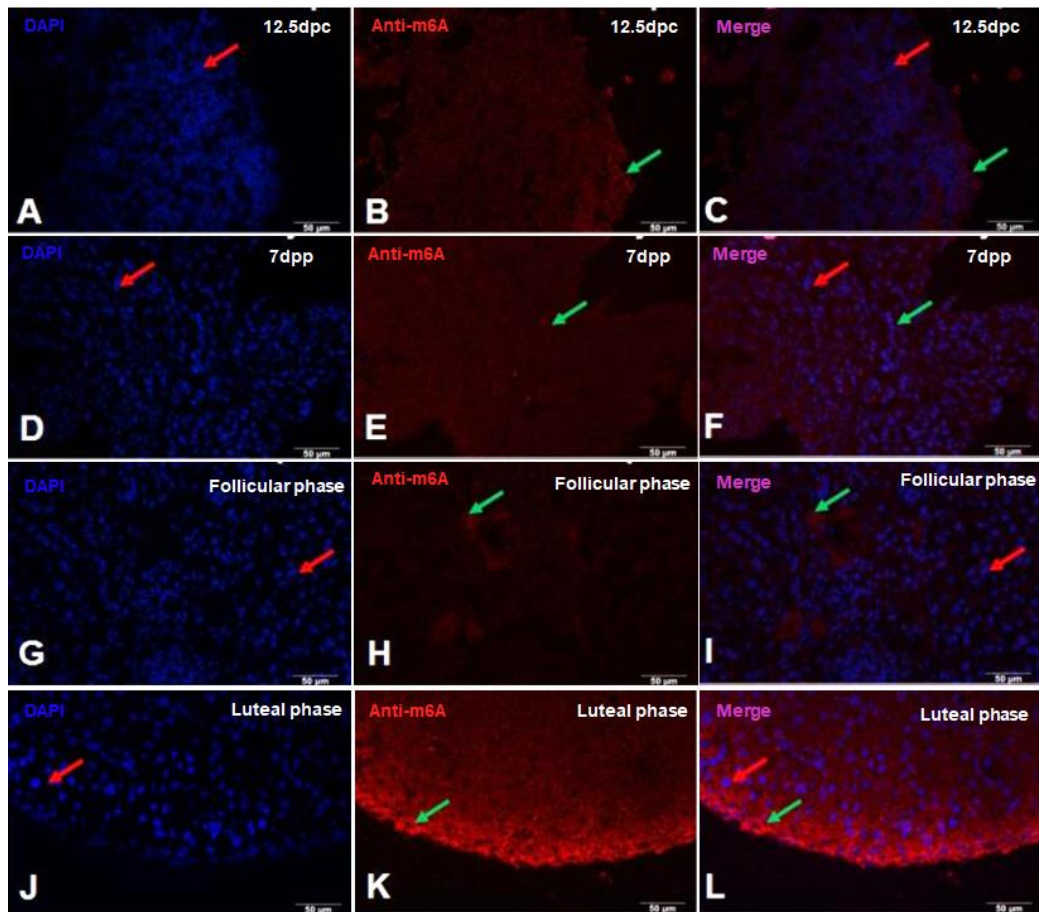

**Figure S6: Immunofluorescence patterns of m6A in genital ridge/ovary of female mice at different stages. (A-C) 12.5 dpc. (D-F) 7 dpp. (G-I) Follicular phase. (J-L) Luteal phase. Blue: DNA, Red: m6A. n=12.**

Figure S7

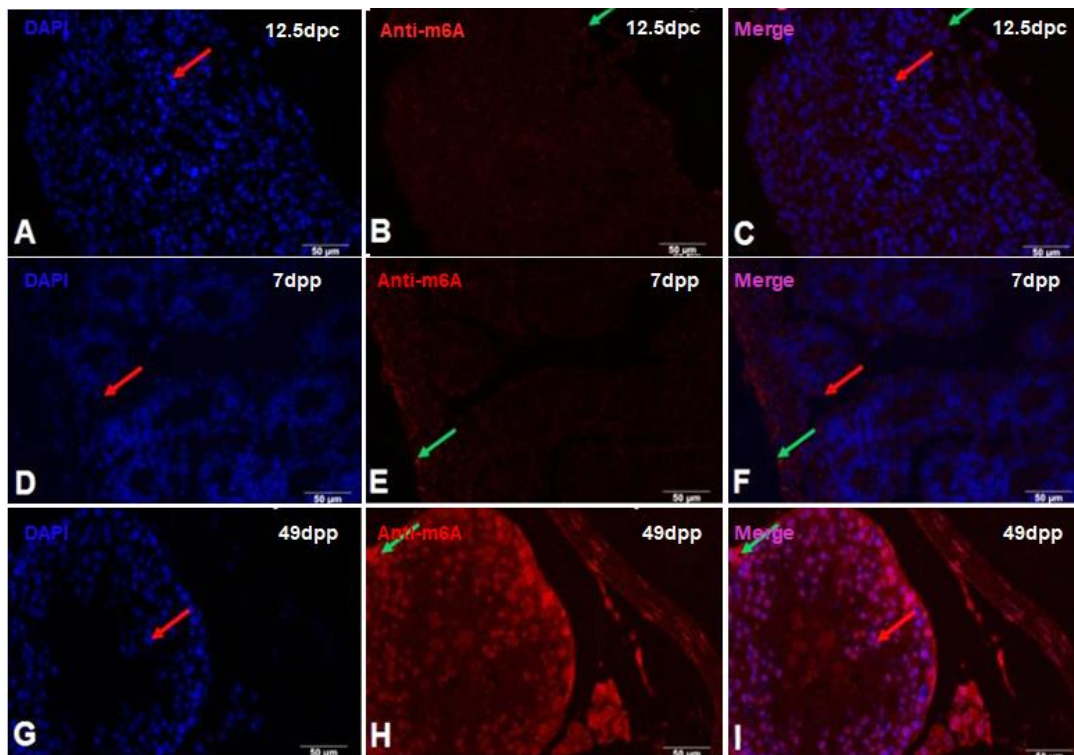

Figure S7: Immunofluorescence patterns of m6A in genital ridge/testis of male mice at different stages.

(A-C) 12.5 dpc. (D-F) 7 dpp. (G-I) Adult stage. Blue: DNA, Red: m6A. n=12.

# Figure S8

| Compound:A  |          |      |           |
|-------------|----------|------|-----------|
| Sample Name | Std.Conc | RT   | Area      |
| A1          | 1        | 1.89 | 680.318   |
| A2          | 2        | 1.90 | 1673.256  |
| A3          | 5        | 1.89 | 3871.571  |
| A4          | 100      | 1.89 | 8156.543  |
| A5          | 200      | 1.91 | 14405.952 |
| A6          | 500      | 1.90 | 34962.227 |
| A7          | 1000     | 1.90 | 64940.777 |

| Compound:m6A |          |      |          |
|--------------|----------|------|----------|
| Sample Name  | Std.Conc | RT   | Area     |
| 1.1          | 0.01     | 3.06 | 0.857    |
| m6A2         | 0.02     | 3.07 | 1.545    |
| m6A3         | 0.05     | 3.05 | 32.678   |
| m6A4         | 1        | 3.07 | 108.547  |
| m6A5         | 2        | 3.08 | 302.008  |
| m6A6         | 5        | 3.06 | 677.543  |
| m6A7         | 10       | 3.06 | 1462.245 |

## 标品A的标准曲线

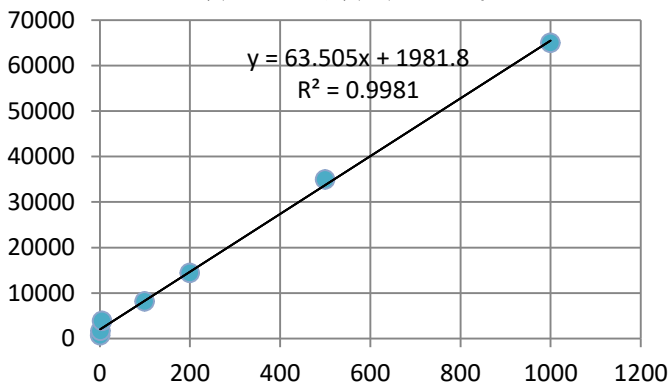

## 标品B的标准曲线

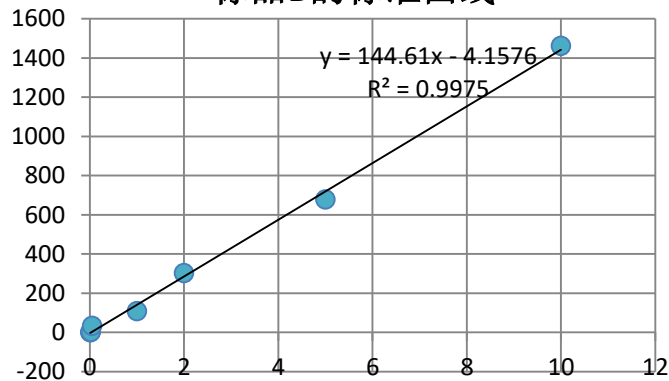

**Figure S8: Mass Spectrometry determination and standard curve construction of A and m6A.** Std: the Measured Concentration, RT: the Peak Time, Area: the Peak Area, n=6.
